# Supplementary material
Source: PubMed Central journal article supplement (PMC9853034)
Supplement: EIJ-D-22-00593_Kostantinis_SD.pdf [file EIJ-D-22-00593_Kostantinis_SD.pdf]

## Supplementary data

**Supplementary Table 1. Incidence of coronary artery perforation in each centre.**

|                      |      |
|----------------------|------|
| <b>Center 1</b>      | 9.3% |
| <b>Center 2</b>      | 8.9% |
| <b>Center 3</b>      | 8.6% |
| <b>Center 4</b>      | 7.2% |
| <b>Center 5</b>      | 5.8% |
| <b>Center 6</b>      | 5.3% |
| <b>Center 7</b>      | 4.6% |
| <b>Center 8</b>      | 4.4% |
| <b>Center 9</b>      | 4.3% |
| <b>Center 10</b>     | 4.1% |
| <b>Center 11</b>     | 3.7% |
| <b>Center 12, 13</b> | 3.6% |
| <b>Center 14</b>     | 3.1% |
| <b>Center 15</b>     | 3.0% |
| <b>Center 16</b>     | 2.6% |
| <b>Center 17, 18</b> | 2.5% |
| <b>Center 19</b>     | 2.4% |
| <b>Center 20</b>     | 2.3% |
| <b>Center 21, 22</b> | 2.1% |
| <b>Center 23</b>     | 1.8% |

|                              |      |
|------------------------------|------|
| <b>Center 24</b>             | 1.7% |
| <b>Center 25</b>             | 1.6% |
| <b>Center 26</b>             | 1.5% |
| <b>Center 27, 28</b>         | 1.4% |
| <b>Center 29, 30</b>         | 1.2% |
| <b>Center 31, 32</b>         | 1.0% |
| <b>Center 33</b>             | 0.7% |
| <b>Center 34</b>             | 0.5% |
| <b>Center 35, 36, 37, 38</b> | 0%   |

**Supplementary Table 2. A calculator incorporating the variables in the final prediction model.**

| <b>Variables</b>                                       | <b>Logistic regression beta coefficients</b> |          |          |    |   |
|--------------------------------------------------------|----------------------------------------------|----------|----------|----|---|
| Age                                                    | 0.0331748                                    |          |          |    |   |
|                                                        |                                              |          |          |    |   |
| Moderate-severe calcification (Y/N)                    | 0.5653086                                    | Yes      | 0.565309 | No | 0 |
|                                                        |                                              |          |          |    |   |
| Crossing strategy (1 for ADR, 2-if retrograde is used) |                                              |          |          |    |   |
| 1                                                      | 0.8438278                                    | Yes      | 0.843828 | No | 0 |
|                                                        |                                              |          |          |    |   |
| 2                                                      | 1.375603                                     | Yes      | 1.375603 | No | 0 |
|                                                        |                                              |          |          |    |   |
| Constant                                               | -6.814339                                    |          |          |    |   |
|                                                        |                                              |          |          |    |   |
| Stump (Blunt/No)                                       |                                              |          |          |    |   |
| 0                                                      |                                              | 0        |          |    |   |
| 1                                                      |                                              | 0.373537 |          |    |   |

ADR = antegrade dissection and re-entry.

**Supplementary Table 3. Perforation type according to the crossing strategy that caused the perforation.**

|                              | AWE<br>(n=133) | ADR<br>(n=46) | Retrograde<br>(n=118) |
|------------------------------|----------------|---------------|-----------------------|
| Large vessel, n (%)          | 62 (50)        | 31 (72)       | 41 (35)               |
| Distal vessel, n (%)         | 61 (50)        | 12 (28)       | 11 (9)                |
| Septal collateral, n (%)     | 0              | 0             | 26 (22)               |
| Epicardial collateral, n (%) | 0              | 0             | 40 (34)               |

AWE = antegrade wire escalation; ADR = antegrade dissection and re-entry.

**Supplementary Table 4.** Simulated patient: an 80-year-old patient, moderate-severe calcification, tapered stump, retrograde strategy (9.8% perforation risk).

| <b>Clinical perforation % risk calculator</b> |        |
|-----------------------------------------------|--------|
| Age (continuous)                              | 80     |
| Crossing strategy (0AWE, 1ADR, 2Retrograde)   | 2      |
| Mod-sev calcification (no/yes)                | yes    |
| Blunt/no stump (0/1)                          | 0      |
|                                               |        |
| % perforation risk                            | 9.8018 |

AWE = antegrade wire escalation; ADR = antegrade dissection and re-entry.

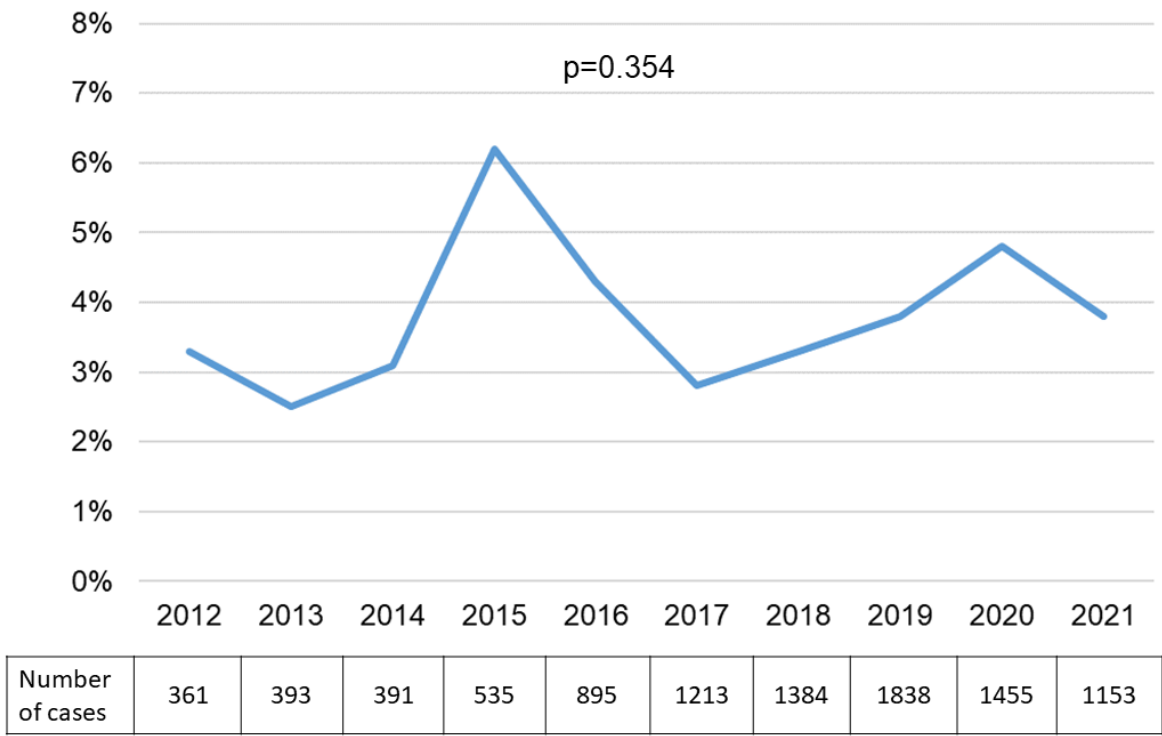

**Supplementary Figure 1.** Temporal trend on clinical coronary perforation.

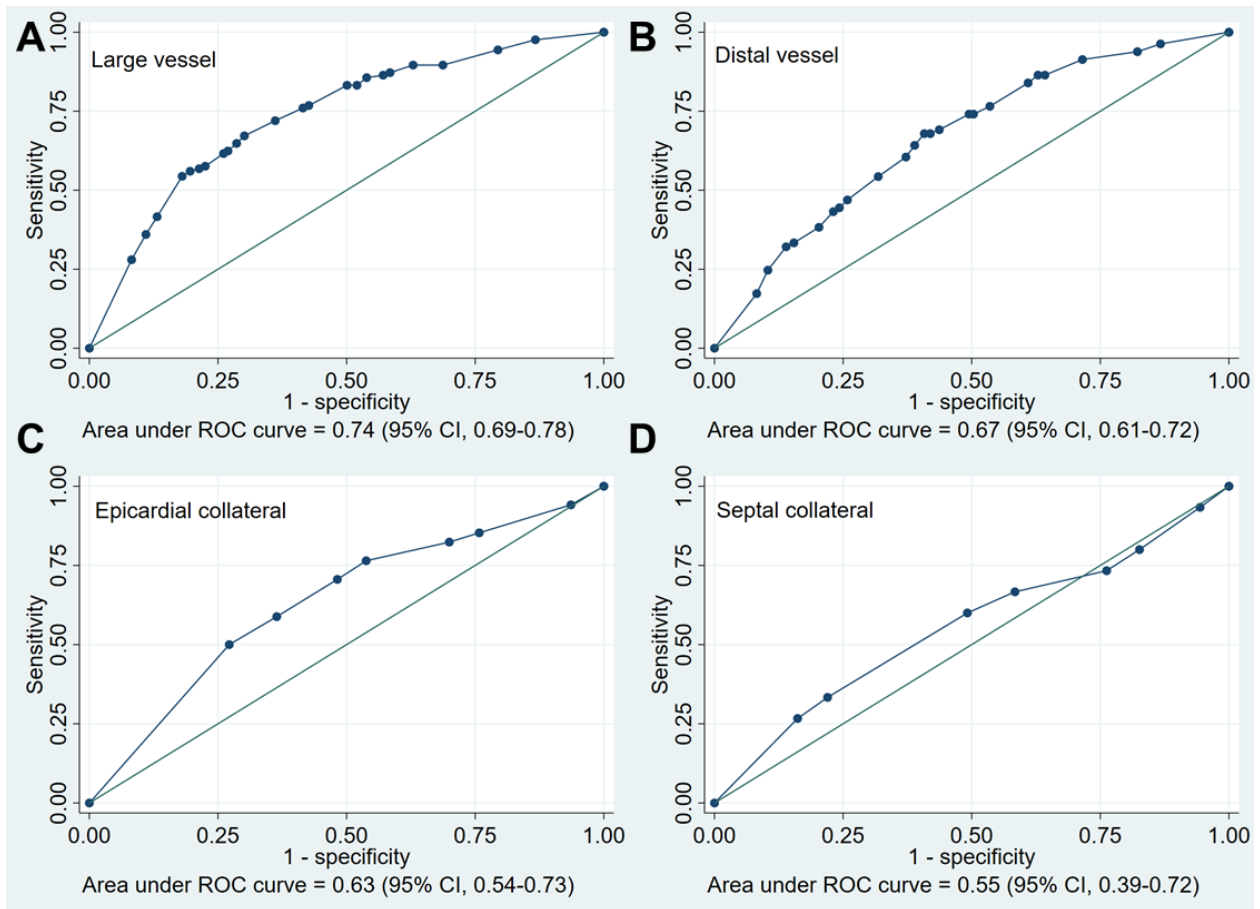

**Supplementary Figure 2.** Validation of the PROGRESS-CTO perforation score on the different types of clinical perforations.

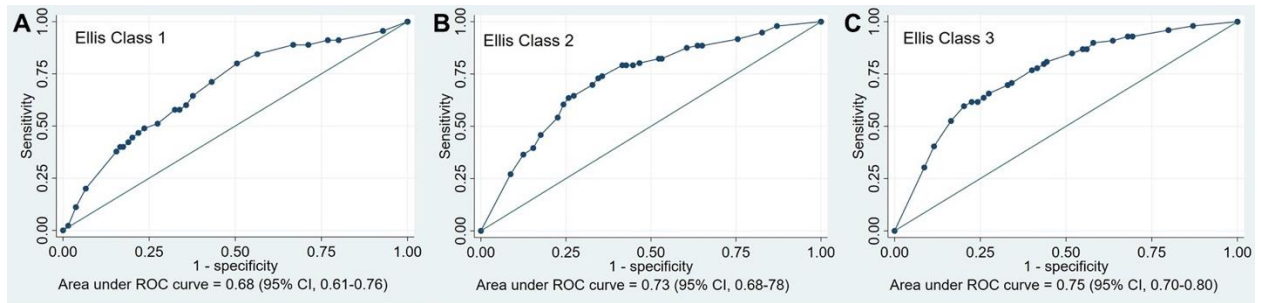

**Supplementary Figure 3.** Validation of the PROGRESS-CTO perforation score on perforation severity (Ellis Class).
